1 ***Mycobacterium tuberculosis* infection boosts B cell**  
2 **responses to unrelated pathogens**

3 Simon G. Kimuda<sup>a,b</sup>, Irene Andia-Biraro<sup>a,c</sup>, Ismail Sebina<sup>a,1</sup>, Moses Egesa<sup>a,b</sup>, Angela Nalwoga<sup>a,d</sup>,  
4 Steven G. Smith<sup>e</sup>, Bernard S. Bagaya<sup>f</sup>, Jonathan Levin<sup>a,2</sup>, Alison M. Elliott<sup>a,d</sup>, John G. Raynes<sup>e</sup> and  
5 Stephen Cose<sup>a,b,d,3</sup>

6 <sup>a</sup> MRC/UVRI and LSHTM Uganda Research Unit, Entebbe, Uganda

7 <sup>b</sup> Department of Medical Microbiology, School of Biomedical Sciences, Makerere University College  
8 of Health Sciences, Kampala, Uganda

9 <sup>c</sup> Department of Internal Medicine, School of Medicine, Makerere University College of Health  
10 Sciences, Kampala, Uganda

11 <sup>d</sup> Department of Clinical Research, London School of Hygiene & Tropical Medicine, London,  
12 United Kingdom

13 <sup>e</sup> Department of Infection Biology, London School of Hygiene & Tropical Medicine, London,  
14 United Kingdom

15 <sup>f</sup> Department of Immunology and Molecular Biology, School of Biomedical Sciences, Makerere  
16 University College of Health Sciences, Kampala, Uganda

17 <sup>1</sup> Present address: QIMR Berghofer Medical Research Institute, Brisbane, Australia

18 <sup>2</sup> Present address: Division of Epidemiology and Biostatistics, School of Public Health, University of  
19 the Witwatersrand, Johannesburg, South Africa

20

21 <sup>3</sup> To whom correspondence should be addressed. Email: [stephen.cose@lshtm.ac.uk](mailto:stephen.cose@lshtm.ac.uk)

22

## 23 Abstract

24 Antigens from *Mycobacterium tuberculosis* (*M.tb*), have been shown to stimulate human B cell responses  
25 to unrelated recall antigens *in vitro*. However, it is not known whether natural *M.tb* infection or  
26 whether vaccination with the related species, *Mycobacterium bovis* BCG, has a similar effect. This study  
27 investigated the effects of *M.tb* infection and BCG vaccination on B cell responses to heterologous  
28 pathogen recall antigens. Antibodies against several bacterial and viral pathogens were quantified by  
29 ELISA in 68 uninfected controls, 62 individuals with latent TB infection (LTBI) and 107 active  
30 pulmonary TB (APT) cases, and 24 recently BCG-vaccinated adolescents and naive controls.  
31 Antibody avidity was investigated using surface plasmon resonance and B cell ELISPOT assays were  
32 used to measure plasmablast and memory B cell responses (MBC) in APT cases and healthy donor  
33 controls. APT was associated with higher levels of antibodies to tetanus toxoid (TT), diphtheria  
34 toxoid, respiratory syncytial virus, measles virus and Kaposi's sarcoma herpesvirus, compared to  
35 uninfected controls. Vaccination with BCG did not alter levels of antibodies against heterologous  
36 pathogens. TT-specific antibody avidity was increased in APT and the ratio of TT-specific  
37 plasmablasts to MBCs in the APT cases was 7:1. *M.tb* infection boosts serological memory to  
38 heterologous pathogens in human subjects and this process may be driven by polyclonal activation  
39 of memory B cells.

40 **Key words:** Antibodies; *Mycobacterium tuberculosis*; active pulmonary tuberculosis; latent tuberculosis  
41 infection; non-specific responses; avidity; polyclonal activation

## 42 **Significance**

43 *Mycobacterium tuberculosis* (*M.tb*) has potent immunostimulatory properties and has been used in  
44 adjuvant preparations to improve vaccine responses in animals. This study shows that natural *M.tb*  
45 infection in humans is associated with increased antibody and B cell recall responses to heterologous  
46 pathogens. This data suggests a potential role for *M.tb* antigens in immunotherapies designed to  
47 maintain antibody immunity to diverse infections.

48

## 49 **1.0 Introduction**

50 The *Mycobacterium tuberculosis* complex (MTBC) is made up of several mycobacterial species that cause  
51 tuberculosis (TB), a disease that affects millions of people worldwide. There were 10 million cases of  
52 TB disease in 2017, 1.6 million deaths, and a quarter of the world's population is estimated to be  
53 infected (1). Despite the seriousness of the disease caused by MTBC, some of these pathogens have  
54 use as immunotherapies due to their potent immunostimulatory properties. The most important  
55 member of the MTBC, *Mycobacterium tuberculosis* (*M.tb*), is well known for its adjuvant properties. It is  
56 a constituent of Freund's complete adjuvant and is thought to improve vaccine responses through  
57 its stimulatory effect on antigen presenting cells such as dendritic cells and macrophages (2).

58 *Mycobacterium bovis* Bacille Calmette Guerin (BCG) has been used to treat bladder cancer for over 30  
59 years (3). The exact mechanism of action has not been fully elucidated, but the common hypothesis  
60 is that BCG draws innate immune cells into the bladder and primes them to attack cancer cells (4).

61 Increasing evidence has been put forward supporting a potential role for BCG in the protection of  
62 infants from diseases caused by heterologous pathogens. Early studies in Guinea Bissau showed a  
63 decrease in deaths from infectious diseases among low birth weight infants who were given BCG  
64 vaccine at birth (5,6). These effects are thought to be as a result of improved function of innate  
65 immune cells brought about by cellular epigenetic modifications induced by BCG (9). There may  
66 also be non-specific effects on the adaptive immune system. Ota *et al.* (7) described higher hepatitis  
67 B virus-specific antibody responses in infants who were given BCG in addition to hepatitis B  
68 vaccination at birth, compared to those who were only vaccinated with hepatitis B. A more recent  
69 study by Ritz and colleagues (8) reported that the level of antibodies elicited by pneumococcal  
70 vaccination of infants at two, four and six months of age were higher in those infants who were  
71 given BCG at birth compared to those who were not. BCG may therefore improve immune

72 responses to vaccines given at the same time as BCG or those given following BCG vaccination, in a  
73 non-specific manner.

74 The studies highlighted above describe the effect of mycobacteria on responses to concurrently  
75 administered vaccine antigens or those given after vaccination with mycobacterial preparations.  
76 However, studies in the past have shown that purified protein derivative (PPD) from *M.tb* can  
77 stimulate secretion of antibodies against measles, rubella and herpes simplex viruses from human  
78 peripheral blood mononuclear cells (PBMCs) *in vitro* (10). This finding suggests that *M.tb* may be  
79 able to enhance antibody/B-cell memory responses generated from previous exposure to unrelated  
80 pathogen-derived antigens. The exact immunological mechanism underlying this observation is not  
81 yet known; however, it is possible that *Mycobacterium* antigens could non-specifically activate  
82 pathogen-specific memory B cells (MBCs), resulting in the expansion of antibody-secreting cells and  
83 a subsequent rise in antibody levels. Human MBCs are prone to activation by polyclonal stimulation;  
84 studies by Bernasconi and colleagues (11) have shown that stimulation of these cells by bacterial  
85 CpG (cytosine-phosphate-guanine) DNA or by T cell cytokines can lead to their proliferation and  
86 expansion into antibody-secreting cells. However, this hypothesis has not been investigated in regard  
87 to *Mycobacterium tuberculosis* exposure. Furthermore, it is not known whether natural *M.tb* infection  
88 has the same non-specific stimulatory effect on antibody responses to recall antigens from  
89 heterologous pathogens. We also do not know whether recent vaccination with the related species,  
90 *M. bovis* BCG has a similar effect on serological recall responses to unrelated antigens.

91 This study characterised antibody responses to heterologous pathogen recall antigens in uninfected  
92 controls, individuals with a latent TB infection (LTBI) or active pulmonary TB cases (APTb) cases  
93 participating in a TB household contact study in Uganda, as well as adolescent recipients of the  
94 BCG vaccine and their age-matched naïve controls from the United Kingdom. Additionally,

95 polyclonal activation of MBCs was explored as a possible mechanism by studying frequencies of  
96 tetanus toxoid (TT)-specific plasmablasts and MBCs in the APTB cases and healthy donors.

## 97 **2.0 Results**

### 98 **2.1 Demographics**

99 The characteristics of the Ugandan TB household contact study participants have been described  
100 previously (12) and in Supplementary Table 1. In summary, APTB cases and individuals with LTBI  
101 were older than the uninfected individuals and there was a larger proportion of males in the APTB  
102 group in comparison to the other two groups. There were also more HIV positive individuals and a  
103 larger proportion of people of low socioeconomic class among the APTB group.

104 The adolescents studied in the UK were all aged between 12 and 13 years, had no previous BCG  
105 scar and were tuberculin skin test negative (13).

### 106 **2.2 *M.tb* infection state is associated with increased antibody 107 responses to unrelated pathogens**

108 Antibody responses were compared across groups of uninfected individuals, individuals with LTBI  
109 and APTB cases from Uganda to determine the impact of *M.tb* infection state on antibody responses  
110 to heterologous pathogens. Since we were interested in recall responses, we studied antibodies  
111 against antigens contained in childhood vaccines, such as tetanus toxoid (TT), diphtheria toxoid  
112 (DT) and measles virus (MV). We also measured antibodies specific for infections that our  
113 participants may have had a high chance of encountering in childhood in this setting. These included  
114 respiratory syncytial virus (RSV) (14), adenovirus (15), Kaposi's sarcoma herpes virus (KSHV) (16),

115 cytomegalovirus (CMV) (17) and Epstein Barr virus (EBV) (18). *M.tb* purified protein derivative  
116 (PPD) was included as a positive control indicative of mycobacterial exposure. Initial crude analyses  
117 revealed evidence of differences in the levels of antibodies specific to PPD, DT, RSV, MV, KSHV  
118 ORF73, KSHV 8.1 and CMV antigens across the groups (Fig. 1). There were also differences in  
119 total IgG antibody concentrations (Supplementary Fig. 1). There was no evidence of differences in  
120 EBV and adenovirus-specific antibodies across the groups (Supplementary Fig. 1).

121 In the final analyses, associations between *M.tb* infection status and antibody responses were  
122 determined by means of linear regression analysis using the uninfected controls as the baseline  
123 comparison group while adjusting for the effects of age, gender, HIV infection status and  
124 socioeconomic status. APTB was associated with higher levels of anti-PPD, anti-TT, anti-DT, anti-  
125 RSV, anti-MV and anti-KSHV 8.1 compared to the uninfected individuals but there was no  
126 association between *M.tb* infection status and anti-KSHV ORF73 or anti-CMV antibodies (Table 1).  
127 Total IgG levels were raised in the APTB cases compared to the uninfected controls (Supplementary  
128 Table 2). There were no associations between *M.tb* infection status and anti-EBV or anti-adenovirus  
129 antibodies, in agreement with findings from the crude analyses (Supplementary Table 2). LTBI was  
130 associated with higher anti-DT antibodies and weakly associated with higher anti-TT antibodies.  
131 LTBI was also marginally associated with higher anti-PPD antibodies. Taken together, these results  
132 show that *M.tb* infection, particularly APTB, is associated with higher levels of antibody responses to  
133 several heterologous pathogen recall antigens.

134

135 **Table 1: Associations between *Mycobacterium tuberculosis* infection status and**  
 136 **concentrations of IgG antibodies to heterologous pathogen antigens \***

| Antibody optical density | Adjusted GMR (95%CI) <sup>†</sup> | P value          |
|--------------------------|-----------------------------------|------------------|
| <b>Anti-PPD</b>          |                                   |                  |
| Uninfected               | 1                                 |                  |
| LTBI                     | 1.286 (0.995 - 1.663)             | 0.055            |
| APTB                     | <b>3.326 (2.446 - 4.524)</b>      | <b>&lt;0.001</b> |
| <b>Anti-TT</b>           |                                   |                  |
| Uninfected               | 1                                 |                  |
| LTBI                     | 1.448 (0.969 - 2.164)             | 0.071            |
| APTB                     | <b>1.608 (1.082 - 2.390)</b>      | <b>0.019</b>     |
| <b>Anti-DT</b>           |                                   |                  |
| Uninfected               | 1                                 |                  |
| LTBI                     | <b>1.443 (1.002 - 2.079)</b>      | <b>0.049</b>     |
| APTB                     | <b>1.516 (1.123 - 2.047)</b>      | <b>0.007</b>     |
| <b>Anti-RSV</b>          |                                   |                  |
| Uninfected               | 1                                 |                  |
| LTBI                     | 0.922 (0.806 - 1.053)             | 0.230            |
| APTB                     | <b>1.178 (1.066 - 1.301)</b>      | <b>0.001</b>     |
| <b>Anti-MV</b>           |                                   |                  |
| Uninfected               | 1                                 |                  |
| LTBI                     | 1.074 (0.798 - 1.445)             | 0.639            |
| APTB                     | <b>1.599 (1.286 - 1.988)</b>      | <b>&lt;0.001</b> |
| <b>Anti-KSHV ORF73</b>   |                                   |                  |
| Uninfected               | 1                                 |                  |
| LTBI                     | 1.051 (0.926 - 1.192)             | 0.441            |
| APTB                     | 1.142 (0.994 - 1.312)             | 0.062            |
| <b>Anti-KSHV K8.1</b>    |                                   |                  |
| Uninfected               | 1                                 |                  |
| LTBI                     | 1.112 (0.695 - 1.778)             | 0.658            |
| APTB                     | <b>1.969 (1.201 - 3.227)</b>      | <b>0.007</b>     |
| <b>Anti-CMV</b>          |                                   |                  |
| Uninfected               | 1                                 |                  |
| LTBI                     | 0.893 (0.615 - 1.298)             | 0.553            |
| APTB                     | 1.029 (0.782 - 1.354)             | 0.837            |

137 GMR: geometric mean ratio, LTBI: latent tuberculosis infection, APTB: active pulmonary  
 138 tuberculosis, PPD: purified protein derivative, TT: tetanus toxoid, DT: diphtheria toxoid, RSV:  
 139 respiratory syncytial virus, MV: measles virus, KSHV: Kaposi's sarcoma herpesvirus, CMV:  
 140 cytomegalovirus

141 \* Linear regression analysis of antibody data from 67 uninfected controls, 62 individuals with LTBI  
 142 and 89 APTB cases.

143 † Adjusted for age, gender, socioeconomic status and HIV infection status.



## 144 **2.2 BCG vaccination is not associated with increased** 145 **antibody responses to unrelated pathogens**

146 Next, we determined whether recent vaccination with the related species, *Mycobacterium bovis* BCG,  
147 was also associated with elevated antibody responses to unrelated recall pathogen antigens. Antibody  
148 responses were evaluated in a UK cohort of adolescents comprising a test group of 12 individuals  
149 who received BCG, and 13 age-matched BCG naïve controls, and the two compared at timepoints  
150 before and 3 weeks after vaccination of the test group. This cohort allowed us to compare BCG  
151 vaccinated individuals to a BCG naïve group, which we could not do in the Ugandan participants  
152 because BCG is routinely given to infants as part of the Uganda National Expanded Programme on  
153 Immunisation (19).

154 We observed no differences in antibody responses to any antigen, including PPD, between the BCG  
155 vaccinated individuals and naïve controls at the 3 week time point (Figure 2a). These results  
156 mirrored non-significant differences observed between the two groups before BCG vaccination  
157 (Figure 2b). These findings indicate that BCG vaccination may not be able to boost antibody  
158 responses to heterologous pathogens, or at least not within the 3 week time frame.

159

## 160 **2.3 Avidity of tetanus toxoid and measles virus-specific**

### 161 **antibodies is increased in APTB**

162 We determined whether the observed increases in antibody responses to unrelated recall antigens in  
163 *M.tb* infected individuals was accompanied by changes in their avidity or overall binding strength. An  
164 increase in avidity could point to MBCs being the source of heterologous pathogen antigen-specific  
165 antibodies because these cells would have already undergone affinity maturation. To this end, the  
166 avidity of antibodies against tetanus toxoid (TT) and measles virus haemagglutinin (MVHA) antigens  
167 were investigated using SPR. Due to limitations in sample volumes, only 88 of the 237 KTB study  
168 participants' samples were tested.

169 Initial crude comparisons showed marginal evidence of a difference in dissociation rate (the measure  
170 of avidity) in TT-specific antibodies across the three groups (Figure 3). For the final analysis, linear  
171 regression was used to evaluate associations between *M.tb* infection state and antibody avidity using  
172 the uninfected controls as the baseline comparison group while adjusting for the effects of age,  
173 gender, HIV infection status and socioeconomic status (Table 2). APTB and LTBI were associated  
174 with the presence of TT-specific antibodies of a slower dissociation rate, a sign of higher avidity.  
175 Having APTB was also associated with MVHA specific antibodies of a slower dissociation rate.  
176 These results lend credence to the hypothesis that the increased antibody responses against  
177 heterologous pathogen recall antigens observed in *M.tb* infection arise from antigen-specific MBCs.

178 **Table 2: Association between *M.tb* infection state and SPR derived TT and MVHA specific**  
 179 **antibody dissociation rates ‡**

| Dissociation rate E-06 [kd(s-1)] | Adjusted GMR (95%CI) §       | P value      |
|----------------------------------|------------------------------|--------------|
| <b>Anti-TT antibodies</b>        |                              |              |
| Uninfected                       | 1                            |              |
| LTBI                             | <b>0.728 (0.548 - 0.967)</b> | <b>0.029</b> |
| APTB                             | <b>0.725 (0.582 - 0.902)</b> | <b>0.004</b> |
| <b>Anti-MVHA antibodies</b>      |                              |              |
| Uninfected                       | 1                            |              |
| LTBI                             | 0.971 (0.915 - 1.030)        | 0.331        |
| APTB                             | <b>0.927 (0.861 - 0.998)</b> | <b>0.044</b> |

180 GMR: geometric mean ratio, LTBI: latent tuberculosis infection, APTB: active pulmonary  
 181 tuberculosis

182 ‡ 23 uninfected controls, 25 individuals with LTBI and 34 APTB cases

183 § Adjusted for age, gender, socioeconomic status and HIV infection status

## 184 **2.5 Tetanus toxoid-specific plasmablasts are higher than** 185 **tetanus toxoid-specific memory B cells in APTB**

186 In order to explore the possibility that *M.tb* infection may be driving differentiation of MBCs  
187 specific to unrelated recall antigens into plasmablasts in our study participants, we examined the  
188 frequency of TT-specific MBCs and plasmablasts in 48 APTB cases and 115 healthy donors using B  
189 cell ELISPOT assays.

190 We had limited PBMC numbers from the APTB cases and so MBC frequencies were ascertained in  
191 18 of the APTB cases while plasmablast frequencies were evaluated in the rest (n=30). The ratio of  
192 the median frequencies of TT-specific plasmablasts to MBC in the APTB cases was 7:1 (8.75:1.25;  
193 Figure 4). The high abundance of TT-specific plasmablasts relative to MBCs in the APTB cases  
194 provides evidence of polyclonal activation of antigen-specific MBCs in APTB. This process may be  
195 driving their differentiation into plasmablasts and could explain the increased levels of antibodies  
196 against heterologous pathogen recall antigens observed in active TB disease.

197 Efforts to determine TT-specific plasmablast to MBC ratio in the healthy donors for comparison  
198 were not possible because TT-specific plasmablasts were not readily detected during preliminary  
199 analyses. However, high frequencies of TT-specific MBC were detected in these individuals at levels  
200 above those seen in the APTB cases (Supplementary Fig. 2). Although TT-specific MBCs have been  
201 shown to remain in circulation years after vaccination, TT-specific plasmablasts are short-lived,  
202 disappearing within 2 weeks after antigen exposure (20). This may explain the lack of detectable TT-  
203 specific plasmablasts in healthy donors.

204

## 205 **3.0 Discussion**

206 This study highlights for the first time a role for natural *M.tb* infection in the boosting of antibody  
207 immunity to heterologous pathogens that individuals may have been previously exposed to, through  
208 infection or immunisation, and shows that vaccination with the related bacterium, *Mycobacterium bovis*  
209 BCG does not have a similar effect. The increase in the levels and avidity of these antibodies in *M.tb*  
210 infected individuals means that MBCs are their likely source. Additionally, the abundance of TT-  
211 specific plasmablasts relative to TT-specific MBCs in active TB disease provides evidence to support  
212 the hypothesis that *M.tb* infection drives polyclonal activation of MBCs generated against unrelated  
213 recall antigens. If this property can be exploited, it may lead to the production of immunological  
214 therapies than can be used to boost serological memory to a wide variety of infections, particularly in  
215 people with waning immunity such as the elderly.

216 The fact that the increase in antibody responses to heterologous pathogens was most evident in  
217 APTB disease may mean that this non-specific effect is most pronounced in a milieu of actively  
218 replicating tubercle bacilli. Indeed, previous research has shown that active TB disease is associated  
219 with increases in cytomegalovirus-specific antibodies (21,22), however, these studies attributed the  
220 rise in antibodies to concurrent infection with CMV rather than as a marker of serological memory.  
221 A study by de Paus and colleagues (2013) observed higher levels of influenza-specific antibodies in  
222 individuals with TB and recognized that in addition to concurrent infection there was a possibility  
223 that these may have arisen as a result of mycobacterial driven non-specific increases in antibodies.  
224 The marginal increases in TT-specific antibody levels in LTBI and the statistically significant  
225 increase in SPR determined TT-specific antibody avidity in LTBI indicate that LTBI, like APTB,  
226 may boost antibody responses to heterologous pathogens, albeit to a lesser extent. It is now  
227 recognised that LTBI is not a fully quiescent state of infection but may at times be associated with

228 subclinical disease arising from reactivation of *M.tb* (24,25). Mycobacterial growth in this state may  
229 drive the observed non-specific increases in antibody responses.

230 The observation that BCG vaccination did not have a similar effect may mean that proteins unique  
231 to *M.tb* may mediate the increase in antibody responses to these heterologous pathogens observed in  
232 APTB. Alternatively, this may point to the effect of BCG mycobacterial load at the site of  
233 inoculation, which may fall short of the *M.tb* bacillary load observed in the lungs during active TB  
234 disease. The lack of significant stimulation of anti-mycobacterial antibodies in the BCG vaccinated  
235 recipients, in contrast to the more than 3-fold rise in the same in the APTB cases (Table 1) supports  
236 this reasoning. The lack of antibody response may also simply be due to the timing after vaccination.  
237 A later time point may have allowed the accrual of BCG-specific antibodies; we were not able to  
238 assess this in our study.

239 Antibody responses to recall antigens from heterologous pathogens were increased in both level and  
240 avidity in *M.tb* infection. This gave further evidence that the source of these antibodies are MBCs  
241 because these cells would have already undergone affinity maturation, and as a consequence produce  
242 antibodies of high avidity. A study by Zimmerman and colleagues (2016) argues that the primary  
243 source of anti-mycobacterial antibodies in TB disease are MBCs, as demonstrated by the high level  
244 of somatic hypermutations in antibody-secreting cells isolated in this disease state. Tubercle bacilli  
245 may drive the activation of MBCs specific to a wide variety of pathogen antigens including those  
246 specific for *M.tb*. A similar phenomenon has been demonstrated for other infections such as malaria  
247 (27), hepatitis C (28) and hantavirus pulmonary disease (29). Bernasconi and colleagues (2006) have  
248 previously shown that MBCs are easily activated by polyclonal stimuli such as bacterial DNA and  
249 the cytokines evoked following vaccination. It is, therefore, possible that mycobacterial products and  
250 cytokine milieu present during human *M.tb* infection may activate MBCs leading to their

251 differentiation to antibody-secreting cells. Our B cell ELISPOT data illustrated an abundance of TT-  
252 specific plasmablasts relative to TT-specific MBCs in APTB. Frequencies of TT-specific MBCs were  
253 lower in APTB cases in comparison to healthy donors while TT-specific plasmablasts were not  
254 readily detected in the latter. These observations further support the hypothesis that *M.tb* drives  
255 MBC polyclonal activation. It is not clear how the *M.tb* may benefit from increasing recall antibody  
256 responses to other pathogens. However, we speculate that this process may aid in the survival of  
257 *M.tb* within the host by limiting host death as a result of infection by unrelated pathogens.

258 It is unclear as to why APTB was only significantly associated with antibody responses to some  
259 pathogen recall antigens and not others. This may relate to varied rates of exposure to the different  
260 infections over time, with multiple recent exposures masking any “benefit” gleaned from  
261 mycobacterial driven MBC activation. Certain pathogens such as EBV has been shown to establish  
262 latency in memory B cells (31). This virus has also been shown to increase proliferation and  
263 activation of B cells and add to the effect of known TLR agonists such as CpG (32). This would  
264 support the idea of increased EBV antibody responses in *M.tb* infected individuals, however, this  
265 was not observed in our study.

266 This study has a few limitations. We assumed that the antibody responses detected against the  
267 chosen heterologous pathogen antigens in our study participants arose as a result of past exposure  
268 via infection or vaccination. However, recent or current exposure to these multiple pathogens,  
269 although unlikely, was possible.

270 On the whole, these data show a hitherto unknown role for *M.tb* in the maintenance of serological  
271 memory generated against past infections and vaccinations. It has been hypothesised that exposure  
272 to infections in later life could help maintain antibody responses to a broad set of pathogens in the  
273 absence of their specific antigens. This process is proposed to be due to polyclonal stimulation of

274 antigen MBCs (11,30) and the data presented here would support this. However, further  
275 experimentation is required to confirm the mechanism involved and identify the specific *M.tb*  
276 antigens mediating this process. This research may aid in the development of therapeutics to boost  
277 antibody immunity to heterologous pathogens. It is envisaged that this treatment could be useful in  
278 ageing populations in whom antibody responses to specific infections are known to wane. The  
279 advantage of this approach is that instead of boosting these individuals with multiple vaccine  
280 antigens, a single treatment could be provided to increase serological immunity to several pathogens  
281 all at once.



## 282 **4.0 Materials and Methods**

### 283 **4.1 Study populations and design**

284 A cross-sectional study design was used to determine whether there were associations between *M.tb*  
285 infection status and antibody responses to heterologous pathogen recall antigens in study  
286 participants from a TB household contact study based in Uganda investigating the effect of  
287 coinfections in humans on their susceptibility to infection with *M.tb* (33). Individuals with APTB  
288 and their household contacts (HHCs) were recruited from the suburbs of Kampala. The APTB  
289 cases were all adults over 18 years of age and had either only recently began anti-TB treatment or  
290 received treatment for less than 4 weeks. APTB was ascertained using acid fast bacilli sputum  
291 microscopy. Individuals with LTBI were identified from among healthy HHCs using the tuberculin  
292 skin test and QuantiFERON-TB Gold in-tube (QFT-GIT) test. The HHCs that tested positive on  
293 both these tests were classified as having LTBI whereas those that tested negative on both tests were  
294 classified as uninfected controls. A total of 68 uninfected controls, 62 individuals with LTBI and 107  
295 APTB cases were included in our study. QuantiFERON-TB Gold in-Tube (QFT-GIT) nil  
296 supernatant samples from these individuals were used for the antibody analyses. The choice of  
297 QFT-GIT supernatants was because serum samples were not available for all the individuals studied.  
298 We have previously shown that there are no differences between antibody concentrations obtained  
299 from assaying serum and those from assaying QFT-GIT supernatants (34).

300 Stored plasma samples from adolescents participating in a UK based prospective study on BCG  
301 responses were used to determine whether BCG vaccination was associated with non-specific  
302 increases in antibody responses to heterologous pathogen recall antigens. These individuals were  
303 part of a UK government programme on BCG vaccination in schools in the year 2005 and were

304 invited to take part in a research study that sought to identify immune responses involved in BCG  
305 mediated protection against TB. The adolescents studied included 12 subjects who were given BCG  
306 and then followed up after three weeks as well as 13 age-matched controls who did not receive BCG  
307 and were followed up for the same period of time. All the subjects had no previous BCG scar (a sign  
308 of earlier BCG vaccination) and had a negative TST prior to immunisation (13). Samples obtained  
309 from these individuals before BCG vaccination and at the 3 week timepoint were analysed. This  
310 cohort was chosen because it gave us the unique opportunity to compare BCG vaccinated and  
311 unvaccinated controls, something which could not be easily done in Ugandan cohorts considering  
312 BCG is part of the immunisation schedule in the country (19).

313 In order to investigate MBC polyclonal activation as a possible cause of the elevated antibody  
314 responses to heterologous pathogens in people with TB, cryopreserved PBMCs from 48 APTB  
315 cases from the TB household contact study and fresh PBMCs from 115 healthy donor controls were  
316 analysed to determine the effect of an active TB infection on the frequencies of tetanus toxoid-  
317 specific plasmablasts and MBCs. The healthy donors were recruited from a voluntary HIV  
318 counselling and testing clinic at the Uganda Virus Research Institute. They were all HIV negative,  
319 aged 18-55 years and found to be healthy by a clinician.

320 These studies were all exploratory and the sample size was determined by the availability of  
321 sufficient samples and reagents for laboratory analyses.

## 322 **4.2 Ethics Statement**

323 Informed written consent was obtained from all the adult study participants. The parents of the  
324 adolescent participants provided written informed consent and verbal consent was obtained from  
325 the participants themselves. This research was approved by Research & Ethics Committees at the

326 Makerere University School of Biomedical Sciences and School of Medicine, the Uganda Virus  
327 Research Institute, the London School of Hygiene & Tropical Medicine and Uganda National  
328 Council for Science and Technology.

## 329 **4.3 Laboratory assays**

### 330 **4.3.1 In-house antigen-specific IgG ELISA**

331 Immulon 4 HBX microtiter plates (Thermo Scientific, USA) were coated with 50  $\mu$ l/well of 5  $\mu$ g/ml  
332 diphtheria toxoid, 5  $\mu$ g/ml tetanus toxoid (both from National Institute for Biological Standards and  
333 Control), purified protein derivative (PPD) of *M.tb* (Serum Statens Institute, Denmark), respiratory  
334 syncytial virus antigen, measles grade 2 antigen, adenovirus grade 2 antigen, 1.25  $\mu$ g/ml Epstein Barr  
335 viral capsid (all from Microbix, Biosystems, Canada) or 0.1% (w/v) skimmed milk (control for  
336 nonspecific binding) in carbonate-bicarbonate buffer (pH 9.6) at 4 °C overnight. Following  
337 overnight incubation, the plates were washed four times with 1x PBS (pH 7.4) containing 0.05%  
338 Tween 20 (PBS- T). The plates were then blocked with 150  $\mu$ l/well 1% (w/v) skimmed milk in PBS-  
339 T for 2 h at room temperature. A dilution of 1 in 100 of each sample in 0.1% skimmed milk PBS-T  
340 (assay buffer) was made and 50  $\mu$ l was then added to the antigen-coated and control wells. After an  
341 incubation of 2 h at room temperature, the wells were washed as before and incubated with 50  
342  $\mu$ l/well polyclonal rabbit anti-human IgG conjugated with horseradish peroxidase (Dako, Denmark)  
343 at 0.5  $\mu$ g/ml for another hour at room temperature. Plates were then washed four times and enzyme  
344 activity detected by incubation with 100  $\mu$ l/well o-phenylenediamine (Sigma) containing hydrogen  
345 peroxide for 15 min at room temperature in the dark. The reaction was stopped by addition of 25  
346  $\mu$ l/well 2 M sulphuric acid and thereafter the optical density (OD) measured at a test wavelength of  
347 490 nm and a reference wavelength of 630 nm in an ELISA plate reader (Biotek). The ODs from

348 the control wells were subtracted from the test antigen wells to eliminate background antibody  
349 levels.

### 350 **4.3.2 KSHV antibody ELISA**

351 Immulon 4 HBX microtiter plates pre-coated with K8.1 or ORF73 were kindly provided by the  
352 Viral Oncology Section, AIDS and Cancer Virus Program, SAIC-Frederick, Inc., NCI-Frederick,  
353 Frederick, MD 21702. In the coating procedure, 100  $\mu$ l/well of 2  $\mu$ g/ml K8.1 or ORF73 diluted in  
354 0.05 M carbonate/bicarbonate buffer, pH 10 or 1x PBS respectively was incubated in plate wells  
355 overnight at 4 °C. The plates were washed three times with PBS- T and then blocked with 280  
356  $\mu$ l/well of assay buffer [2.5% (w/v) BSA (Sigma), 2.5% (v/v) normal donor goat serum (Equitech-  
357 Bio), 0.005% (v/v) Tween 20, 0.005% (v/v) Triton X-100 in 1x PBS] for 3 h at 37 °C and thereafter  
358 stored at 80 °C until use.

359 The plates were thawed at 37 °C in preparation for the assay and washed three times with PBST. A 1  
360 in 100 dilution of the sample or controls was prepared and then 100  $\mu$ l was added per well in  
361 duplicate. Each plate had 3 positive and 2 negative control samples for quality control. After an  
362 incubation of 90 min at 37 °C, the wells were washed five times and incubated with 100  $\mu$ l/well goat  
363 anti-human IgG conjugated with alkaline phosphatase (Roche Diagnostics) diluted 1 in 5,000 for 30  
364 min at 37 °C. The plates were washed five times and enzyme activity detected by incubation with  
365 100  $\mu$ l/well 1-step p-nitrophenyl phosphate substrate solution (Thermo Scientific Pierce, USA) for  
366 30 min at room temperature in the dark. This reaction was stopped by the addition of 50  $\mu$ l/well of  
367 3 N NaOH and then the plates were read at a wavelength of 405 nm.

368

### 369 **4.3.3 CMV antibody ELISA**

370 Platelia™ CMV IgG ELISA was used to measure CMV-specific antibodies as per the  
371 manufacturer's instructions (3). Briefly, diluted samples, standards of known anti-CMV antibody  
372 concentration and controls were added to microtitre plates pre-coated with CMV antigens. The  
373 plates were incubated with the samples at 37°C for 45 min and thereafter washed with buffer. A  
374 conjugate composed of horseradish peroxidase enzyme bound onto anti-human IgG monoclonal  
375 antibody was then added to each well and incubated for 45 min at 37°C. The plates were washed  
376 and an enzyme substrate was added to each well followed by a 15-min incubation at room  
377 temperature. After this, a stop solution was added and the OD read at 450 nm wavelength.

### 378 **4.3.4 Total IgG antibody ELISA**

379 Human IgG total Ready-SET-Go (Affymetrix ebioscience) was used to measure total IgG following  
380 the manufacturer's instructions (35). In the procedure, Immulon 4 HBX microtiter plates were  
381 coated with 100 µl/well purified anti-human IgG monoclonal antibody overnight at 4 °C. The plates  
382 were then washed twice with wash buffer and incubated with 250 µl/well blocking buffer for 2 h at  
383 room temperature. The plates were washed twice and eight, recombinant human IgG controls were  
384 prepared and the samples were diluted 1 in 100,000. A volume of 100 µl/well of the prepared  
385 standards and samples was added to the plates and then incubated for 2 h at room temperature. In  
386 the next step, the plates were washed four times and incubated with 100 µl/well HRP-conjugated  
387 anti-human IgG monoclonal detection antibody for 1 h at room temperature. The plates were  
388 washed four times and incubated with 100 µl/well tetramethylbenzidine (TMB) substrate solution  
389 for 15 min at room temperature in the dark. After this duration, the reaction was stopped by  
390 addition of 100 µl/well stop solution and the plates read at 450 nm wavelength.

### 391 **4.3.5 Surface plasmon resonance**

392 The avidity of antibodies directed against tetanus toxoid and measles virus haemagglutinin (MVHA)  
393 antigens was evaluated. These antigens were immobilised onto CM5 sensor chips (Biacore, GE  
394 Healthcare, Amersham) by amine coupling to a level of 2000 RU.

395 Samples were diluted 1 in 3 in HBSPE and run through Bio-Gel® P-30 (Bio-Rad, UK)  
396 polyacrylamide gel spin columns to minimise non-specific binding. They were further diluted 1 in 8  
397 in HBSPE running buffer containing 1% (w/v) carboxymethyl-dextran sodium salt (Sigma) and  
398 analysed in the Biacore 3000 instrument at a temperature of 25°C. A 90 µl volume of sample was  
399 injected over the chip surface at a rate of 15 µl/min followed by a dissociation time of 8 min. Prior  
400 to analysis of the next sample, the chips were regenerated with 50 mM HEPES containing 3 M  
401 MgCl<sub>2</sub> and 25% (v/v) ethylene glycol, followed by 20 mM glycine pH 1.5 and re-equilibration in  
402 HBSPE.

403 BIAevaluation software version 4.1.1 was used for data analysis and control flow-cell traces with  
404 immobilised alpha-1 antitrypsin background were subtracted from test flow cell data. A Langmuir  
405 1:1 dissociation model was used to determine the dissociation rate between 10 seconds and 300  
406 seconds post sample injection.

### 407 **4.3.6 B cell ELISPOT**

408 We used in-house *in vitro* and *ex-vivo* B cell ELISPOTS to determine the frequency of TT-specific  
409 plasmablasts and MBCs respectively in APTB cases and healthy donors following methods  
410 described by Sebina *et al.* (36,37). Cryopreserved PBMCs were thawed, resuspended in RPMI (Gibco  
411 by Life Technologies) containing 10% (v/v) fetal bovine serum, 2 mM L-glutamine (both from

412 Sigma-Aldrich, UK) and 1x penicillin-streptomycin (Invitrogen). The cells were then rested for 4-6  
413 hours at 37°C and 5% CO<sub>2</sub>.

414 In the *in vitro* ELISPOT, PBMCs at a cell density of 1x10<sup>6</sup> cells/ml were stimulated with a mixture of  
415 25 ng/ml human IL-10 (R&D Systems, UK), 0.5 µg/ml of pokeweed mitogen (PWM), 6 µg/ml of  
416 CpG oligodeoxynucleotide, 1.2 mg/ml *Staphylococcus aureus* Cowan, 50 µM β-mercaptoethanol at  
417 37°C and 5% CO<sub>2</sub> for six days. Approximately 4x10<sup>5</sup> of the cultured cells were then transferred to  
418 each well of 96-well filter (Merck Milipore) pre-coated with 2 µg/ml TT in 1x PBS or only 1xPBS.  
419 The plates were sealed and incubated for 6 hours at 37°C and 5% CO<sub>2</sub> after which biotin-SP  
420 conjugated affinipure fragment donkey antihuman IgG (Jackson ImmunoResearch) was added to  
421 the plate wells to aid in the detection of anti-TT specific antibody secreting cells. After overnight  
422 incubation at 4°C, streptavidin-AKP (BD biosciences) was added and the plates incubated for an  
423 hour at room temperature followed by AP-conjugate substrate (Bio-rad, USA) to develop the spots.  
424 After 10 minutes the plate wells were rinsed with water and left to dry before they were read using  
425 an AID ELISPOT reader (AID Diagnostika, Germany). The number of MBCs was then expressed  
426 as the total number of spots per million cells.

427 The *ex vivo* ELISPOT involved the direct transfer of the rested PBMCs to the 96-well filter plates at  
428 a cell density of 4x10<sup>5</sup> cells/well. All the subsequent steps were similar to those described for the *in*  
429 *vitro* ELISPOT.

#### 430 **4.4 Statistical Analysis**

431 Results were analysed using Stata release statistical package and GraphPad Prism software. The  
432 initial analyses were made using the Kruskal-Wallis test to compare antibody responses across the  
433 groups of uninfected controls, individuals with LTBI and active TB cases. Linear regression analysis

434 with bootstrap confidence intervals was then be used to determine associations between *M.tb*  
435 infection status and antibody responses (12,17). Adjusting was done for the effects of potential  
436 confounders such as HIV infection, age, socioeconomic status (SES) and gender. The Wilcoxon  
437 rank sum test was used to compare antibody responses between BCG vaccinated individuals and  
438 BCG naïve controls as well as frequencies of MBCs and PBs in APTB cases.

## 439 **Acknowledgements**

440 This research was supported by Wellcome Trust Uganda PhD Fellowships in Infection and  
441 Immunity held by IAB and SGK, funded by Wellcome Trust Strategic Award Grant no. 084344 and  
442 a Wellcome Trust Masters Training Fellowship (Grant no. 092779) held by IS. SGK also received  
443 support from a Commonwealth Scholarship Commission Split Site PhD Fellowship and through the  
444 DELTAS Africa Initiative (Grant no. 107743). The DELTAS Africa Initiative is an independent  
445 funding scheme of the African Academy of Sciences (AAS), Alliance for Accelerating Excellence in  
446 Science in Africa (AESAs), and supported by the New Partnership for Africa's Development  
447 Planning and Coordinating Agency (NEPAD Agency) with funding from the Wellcome Trust  
448 (Grant no. 107743) and the UK Government. AME and SC received funding from Medical  
449 Research Council UK, grant number MR/K019708/1 and AME also received funding from the  
450 Wellcome Trust, grant number 095778. The views expressed in this publication are those of the  
451 author(s) and not necessarily those of AAS, NEPAD Agency, Wellcome Trust or the UK  
452 government.

## 453 **References**

454 1. World Health Organization. Global tuberculosis report. 2018.



- 455 2. Billiau A, Matthys P. Modes of action of Freund's adjuvants in experimental models of  
456 autoimmune diseases. *J Leukoc Biol.* 2001;70(6):849–60.
- 457 3. Brandau S, Suttman H. Thirty years of BCG immunotherapy for non-muscle invasive  
458 bladder cancer: A success story with room for improvement. *Biomed Pharmacother.*  
459 2007;61(6):299–305.
- 460 4. Zheng Y, Naguib YW, Dong Y, Shi Y, Bou S, Cui Z. Applications of bacillus Calmette-  
461 Guerin and recombinant bacillus Calmette-Guerin in vaccine development and tumor  
462 immunotherapy. *Expert Rev Vaccines.* 2015;14(9):1255–75.
- 463 5. Aaby P, Roth A, Ravn H, Napirna BM, Rodrigues A, Lisse IM, et al. Randomized Trial of  
464 BCG Vaccination at Birth to Low-Birth-Weight Children: Beneficial Nonspecific Effects in  
465 the Neonatal Period? *J Infect Dis.* 2011 Jul 15;204(2):245–52.
- 466 6. Roth A, Jensen H, Garly M-L, Djana Q, Martins CL, Sodemann M, et al. Low Birth Weight  
467 Infants and Calmette-Guérin Bacillus Vaccination at Birth: Community Study from Guinea-  
468 Bissau. *Pediatr Infect Dis J.* 2004;23(6).
- 469 7. Ota MOC, Vekemans J, Schlegel-Haueter SE, Fielding K, Sanneh M, Kidd M, et al. Influence  
470 of *Mycobacterium bovis* Bacillus Calmette-Guérin on Antibody and Cytokine Responses to  
471 Human Neonatal Vaccination. *J Immunol.* 2002 Jan 15;168(2):919 LP-925.
- 472 8. Ritz N, Mui M, Balloch A, Curtis N. Non-specific effect of Bacille Calmette-Guérin vaccine  
473 on the immune response to routine immunisations. *Vaccine.* 2013;31(30):3098–103.
- 474 9. Benn CS, Netea MG, Selin LK, Aaby P. A small jab - a big effect: nonspecific  
475 immunomodulation by vaccines. *Trends Immunol.* 2013 Sep;34(9):431–9.

- 476 10. Biberfeld G, Forsgren M, Von Stedingk L V, Arneborn P. PPD-induced viral antibody  
477 production in human blood lymphocytes. *Clin Exp Immunol*. 1980 Nov;42(2):364–9.
- 478 11. Bernasconi NL, Traggiai E, Lanzavecchia A. Maintenance of Serological Memory by  
479 Polyclonal Activation of Human Memory B Cells. *Science* (80- ). 2002 Dec  
480 13;298(5601):2199 LP-2202.
- 481 12. Kimuda SG, Nalwoga A, Levin J, Franken KLMC, Ottenhoff THM, Elliott AM, et al.  
482 Humoral Responses to Rv1733c, Rv0081, Rv1735c, and Rv1737c DosR Regulon-Encoded  
483 Proteins of *Mycobacterium tuberculosis* in Individuals with Latent Tuberculosis Infection. *J*  
484 *Immunol Res*. 2017 Feb 1;2017:1593143.
- 485 13. Smith SG, Lalor MK, Gorak-Stolinska P, Blitz R, Beveridge NER, Worth A, et al.  
486 *Mycobacterium tuberculosis* PPD-induced immune biomarkers measurable in vitro following  
487 BCG vaccination of UK adolescents by multiplex bead array and intracellular cytokine  
488 staining. *BMC Immunol*. 2010;11(II):35.
- 489 14. Sande CJ, Cane PA, Nokes DJ. The association between age and the development of  
490 respiratory syncytial virus neutralising antibody responses following natural infection in  
491 infants. *Vaccine*. 2014 Aug 20;32(37):4726–9.
- 492 15. Thorner AR, Vogels R, Kaspers J, Weverling GJ, Holterman L, Lemckert AAC, et al. Age  
493 dependence of adenovirus-specific neutralizing antibody titers in individuals from sub-  
494 Saharan Africa. *J Clin Microbiol*. 2006 Oct;44(10):3781–3.
- 495 16. Newton R, Labo N, Wakeham K, Miley W, Asiki G, Johnston WT, et al. Kaposi Sarcoma–  
496 Associated Herpesvirus in a Rural Ugandan Cohort, 1992–2008. *J Infect Dis*. 2018 Jan  
497 4;217(2):263–9.

- 498 17. Lule SA, Mawa PA, Nkurunungi G, Nampijja M, Kizito D, Akello F, et al. Factors associated  
499 with tuberculosis infection, and with anti-mycobacterial immune responses, among five year  
500 olds BCG-immunised at birth in Entebbe, Uganda. *Vaccine*. 2015 Feb;33(6):796–804.
- 501 18. Kafuko GW, Henderson BE, Kirya BG, Munube GM, Tukei PM, Day NE, et al. Epstein-  
502 Barr virus antibody levels in children from the West Nile District of Uganda. Report of a field  
503 study. *Lancet (London, England)*. 1972 Apr;1(7753):706–9.
- 504 19. Ministry of Health/Republic of Uganda. Uganda National Expanded Programme on  
505 Immunization Multi Year Plan 2012-2016. Kampala; 2012.
- 506 20. Franz B, May Jr KF, Dranoff G, Wucherpfennig K. Ex vivo characterization and isolation of  
507 rare memory B cells with antigen tetramers. *Blood*. 2011 Jul 14;118(2):348–57.
- 508 21. Ledru E, Diagbouga S, Ledru S, Cauchoix B, Yameogo M, Chami D, et al. A study of  
509 Toxoplasma and Cytomegalovirus serology in tuberculosis and in HIV-infected patients in  
510 Burkina Faso. *Acta Trop*. 1995 May;59(2):149–54.
- 511 22. Olaleye OD, Omilabu SA, Baba SS. Cytomegalovirus infection among tuberculosis patients in  
512 a chest hospital in Nigeria. *Comp Immunol Microbiol Infect Dis*. 1990;13(2):101–6.
- 513 23. de Paus RA, van Crevel R, van Beek R, Sahiratmadja E, Alisjahbana B, Marzuki S, et al. The  
514 influence of influenza virus infections on the development of tuberculosis. *Tuberculosis*  
515 (Edinb). 2013 May;93(3):338–42.
- 516 24. Schnappinger D, Ehrt S. A broader spectrum of tuberculosis. *Nat Med*. 2016  
517 Oct;22(10):1076–7.
- 518 25. Esmail H, Lai RP, Lesosky M, Wilkinson KA, Graham CM, Coussens AK, et al.

- 519 Characterization of progressive HIV-associated tuberculosis using 2-deoxy-2-[18F]fluoro-D-  
520 glucose positron emission and computed tomography. *Nat Med.* 2016;22(10):1090–3.
- 521 26. Zimmermann N, Thormann V, Hu B, Kohler A-B, Imai-Matsushima A, Loch C, et al.  
522 Human isotype-dependent inhibitory antibody responses against *Mycobacterium tuberculosis*.  
523 *EMBO Mol Med.* 2016 Nov;8(11):1325–39.
- 524 27. Donati D, Mok B, Chêne A, Xu H, Thangarajh M, Glas R, et al. Increased B Cell Survival  
525 and Preferential Activation of the Memory Compartment by a Malaria Polyclonal B Cell  
526 Activator. *J Immunol.* 2006 Sep 1;177(5):3035 LP-3044.
- 527 28. Racanelli V, Frassanito MA, Leone P, Galiano M, De Re V, Silvestris F, et al. Antibody  
528 Production and In Vitro Behavior of CD27-Defined B-Cell Subsets: Persistent Hepatitis C  
529 Virus Infection Changes the Rules. *J Virol.* 2006 Apr 13;80(8):3923–34.
- 530 29. Marina G, Ayelén I, I. LV, Carla B, Agostina B, Teresa CM, et al. Massive plasmablast  
531 response elicited in the acute phase of hantavirus pulmonary syndrome. *Immunology.* 2017  
532 Feb 9;151(1):122–35.
- 533 30. Lanzavecchia A, Bernasconi N, Traggiai E, Ruprecht CR, Corti D, Sallusto F. Understanding  
534 and making use of human memory B cells. *Immunol Rev.* 2006 Jun;211:303–9.
- 535 31. Hatton OL, Harris-Arnold A, Schaffert S, Krams SM, Martinez OM. The interplay between  
536 Epstein-Barr virus and B lymphocytes: implications for infection, immunity, and disease.  
537 *Immunol Res.* 2014 May;58(2–3):268–76.
- 538 32. Iskra S, Kalla M, Delecluse H-J, Hammerschmidt W, Moosmann A. Toll-Like Receptor  
539 Agonists Synergistically Increase Proliferation and Activation of B Cells by Epstein-Barr

- 540 Virus. J Virol. 2010 Apr 1;84(7):3612 LP-3623.
- 541 33. Biraro IA, Egesa M, Toulza F, Levin J, Cose S, Joloba M, et al. Impact of co-infections and  
542 BCG immunisation on immune responses among household contacts of tuberculosis patients  
543 in a Ugandan cohort. PLoS One. 2014;9(11):e111517.
- 544 34. Kimuda SG, Andia-Biraro I, Egesa M, Bagaya BS, Raynes JG, Levin J, et al. Use of  
545 QuantiFERON®-TB Gold in-tube culture supernatants for measurement of antibody  
546 responses. PLoS One. 2017 Nov 21;12(11):e0188396.
- 547 35. Information P. Human IgG total Ready-SET-Go ! ®.
- 548 36. Sebina I, Cliff JM, Smith SG, Nogaro S, Webb EL, Riley EM, et al. Long-Lived Memory B-  
549 Cell Responses following BCG Vaccination. PLoS One. 2012 Dec 11;7(12):e51381.
- 550 37. Sebina I, Biraro IA, Dockrell HM, Elliott AM, Cose S. Circulating B-lymphocytes as potential  
551 biomarkers of tuberculosis infection activity. PLoS One. 2014;9(9):e106796.

## 552 **Figure legends**

553 **Figure 1: Variations in antibody responses to heterologous pathogens across *M.tb* infection**  
554 **state.** The horizontal bars shown are median IgG antibody optical densities in each group. Antibody  
555 responses were compared across uninfected controls (n=68), individuals with LTBI (n=62) and  
556 APTB cases (n=107). The p values shown correspond to results from Kruskal–Wallis test (\*p<0.05,  
557 \*\*p<0.01). PPD: purified protein derivative, TT: tetanus toxoid, DT: diphtheria toxoid, RSV:  
558 respiratory syncytial virus, MV: measles virus, KSHV: Kaposi’s sarcoma herpesvirus, CMV:  
559 cytomegalovirus

560 **Figure 2: Antibody responses to heterologous pathogens in BCG vaccinated individuals and**  
561 **their age-matched BCG naïve controls.** Panel a: antibody responses 3 weeks after BCG  
562 vaccination. Panel b: antibody responses before BCG vaccination. The horizontal bars shown are  
563 median IgG antibody optical density in each group. The p values shown correspond to results from  
564 Wilcoxon rank sum test (\*p<0.05, \*\*p<0.01) from comparing antibody responses in BCG  
565 vaccinated (n=12) and BCG naïve controls (n=13). PPD: purified protein derivative, TT: tetanus  
566 toxoid, DT: diphtheria toxoid, RSV: respiratory syncytial virus, MV: measles virus, CMV:  
567 cytomegalovirus, EBV: Epstein Barr virus.

568 **Figure 3. Variation in tetanus toxoid and measles virus-specific antibody avidity across M.tb**  
569 **infection state.** The Kruskal Wallis test was used to compare antibody dissociation rates across  
570 uninfected controls (n=23), individuals with LTBI (n=25) and APTB cases (n=40). TT: tetanus  
571 toxoid, MVHA: measles virus haemagglutinin

572 **Figure 4. Tetanus toxoid-specific plasmablasts are higher than tetanus toxoid-specific**  
573 **memory B cells in APTB.** MBC: memory B cells, PB: plasmablasts. MBC responses were  
574 evaluated in 18 APTB cases while PB responses were evaluated in 30 APTB cases. The p values are  
575 from Wilcoxon-rank sum tests. TT: tetanus toxoid

576 **Supporting information**

577 **Supplementary figure 1: Antibody responses to Epstein Barr virus and adenovirus and total**  
578 **IgG levels in individuals of varied M.tb infection status.** The horizontal bars shown are median  
579 IgG antibody optical densities in each group. Antibody responses against Epstein Barr virus (EBV)  
580 and adenovirus (panel a) at 1/100 sample dilution and total IgG levels (panel b) at a 1/100,000  
581 sample dilution were compared across uninfected controls (n=68), individuals with LTBI (n=62)

582 and APTB cases (n=107). The p values shown correspond to results from Kruskal–Wallis test  
583 (\*p<0.05, \*\*p<0.01). EBV: Epstein Barr virus

584 **Supplementary figure 2: Lower TT-specific Memory B cell (MBC) frequencies in APTB**

585 **cases compared healthy donor controls.** MBC responses were evaluated in 115 healthy donors

586 and 18 APTB cases. The p values are from Wilcoxon-rank sum tests. TT: tetanus toxoid

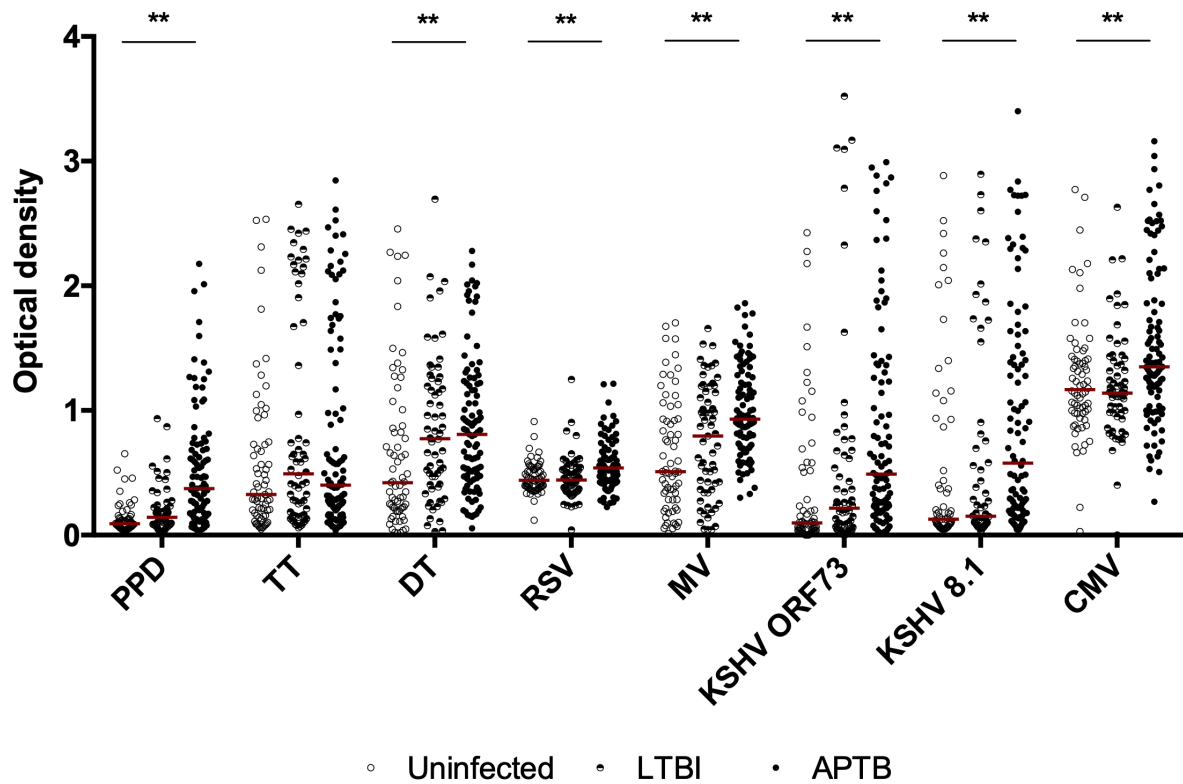

**Figure 1: Variations in antibody responses to heterologous pathogens across *M.tb* infection state.** The horizontal bars shown are median IgG antibody optical densities in each group. Antibody responses were compared across uninfected controls (n=68), individuals with LTBI (n=62) and APTB cases (n=107). The p values shown correspond to results from Kruskal–Wallis test (\*p<0.05, \*\*p<0.01). PPD: purified protein derivative, TT: tetanus toxoid, DT: diphtheria toxoid, RSV: respiratory syncytial virus, MV: measles virus, KSHV: Kaposi’s sarcoma herpesvirus, CMV: cytomegalovirus



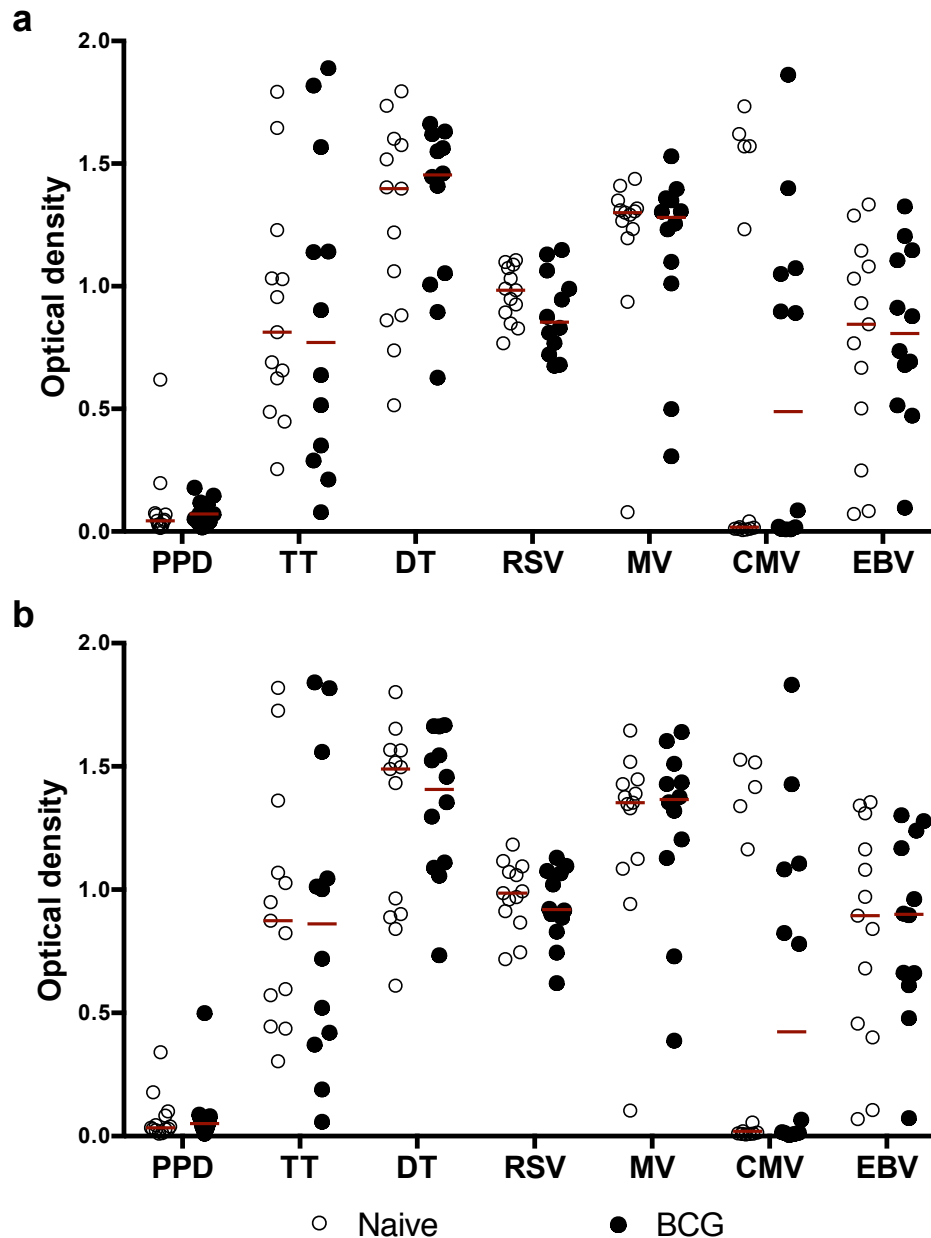

**Figure 2: Antibody responses to heterologous pathogens in BCG vaccinated individuals and their age-matched BCG naïve controls.** Panel a: antibody responses 3 weeks after BCG vaccination. Panel b: antibody responses before BCG vaccination. The horizontal bars shown are median IgG antibody optical density in each group. The p values shown correspond to results from Wilcoxon rank sum test (\* $p < 0.05$ , \*\* $p < 0.01$ ) from comparing antibody responses in BCG vaccinated ( $n = 12$ ) and BCG naïve controls ( $n = 13$ ). PPD: purified protein derivative, TT: tetanus toxoid, DT: diphtheria toxoid, RSV: respiratory syncytial virus, MV: measles virus, CMV: cytomegalovirus, EBV: Epstein Barr virus.

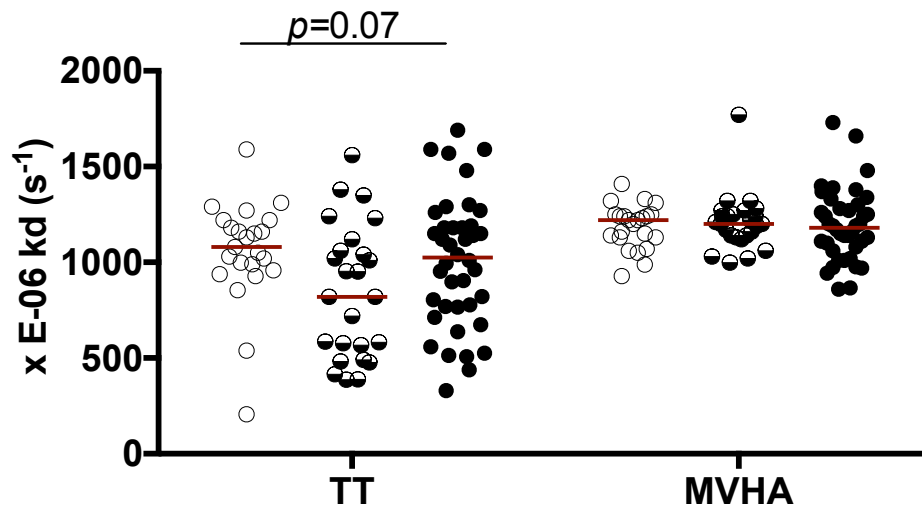

Figure 3. Variation in tetanus toxoid and measles virus-specific antibody avidity across *M.tb* infection state. The Kruskal Wallis test was used to compare antibody dissociation rates across uninfected controls (n=23), individuals with LTBI (n=25) and APTB cases (n=40). TT: tetanus toxoid, MVHA: measles virus haemagglutinin

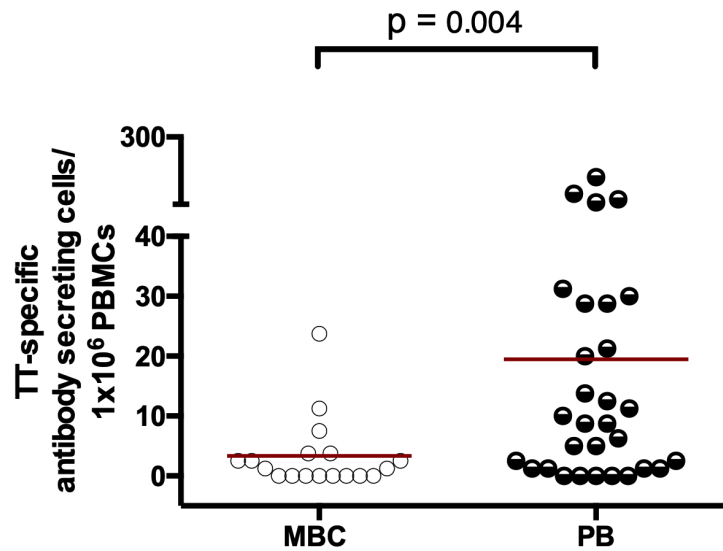

**Figure 4. Tetanus toxoid-specific plasmablasts are higher than tetanus toxoid-specific memory B cells in APTB.** MBC: memory B cells, PB: plasmablasts. MBC responses were evaluated in 18 APTB cases while PB responses were evaluated in 30 APTB cases. The p values are from Wilcoxon-rank sum tests. TT: tetanus toxoid
